# Supplementary material for: Epidemiological and Immunological Features of Obesity and SARS-CoV-2
Source: MDPI journal article supplement (doi:10.3390/v13112235), 2021-11-06
Supplement: s1 [file s1]

# Epidemiological and immunological features of obesity and SARS-CoV-2. Nilles EJ, et al.

**Table S1:** Characteristics and serostatus of South Texas site with high seropositive rate (22.5%) (N=712)

| Covariate <sup>1</sup>           | All participants<br>(n=712) | Seropositive participants<br>(n=160) |       | OR (95% CI)          | P-Value <sup>2</sup> |
|----------------------------------|-----------------------------|--------------------------------------|-------|----------------------|----------------------|
|                                  | N                           | N                                    | %     |                      |                      |
| Age group                        |                             |                                      |       |                      |                      |
| 18-29 y                          | 345                         | 86                                   | 24.9% | ref                  |                      |
| 30-39 y                          | 181                         | 35                                   | 19.3% | 0.72 (0.46 to 1.12)  | 0.1488               |
| 40-49 y                          | 128                         | 28                                   | 21.9% | 0.84 (0.52 to 1.37)  | 0.4907               |
| 50-59 y                          | 45                          | 10                                   | 22.2% | 0.86 (0.41 to 1.81)  | 0.6921               |
| 60+ y                            | 12                          | 1                                    | 8.3%  | 0.27 (0.03 to 2.15)  | 0.2179               |
| Body mass index                  |                             |                                      |       |                      |                      |
| <18.5                            | 8                           | 1                                    | 12.5% | 0.35 (0.04 to 2.91)  | 0.3291               |
| 18.5-<25                         | 144                         | 42                                   | 29.2% | ref                  |                      |
| 25-<30                           | 230                         | 53                                   | 23.0% | 0.73 (0.45 to 1.17)  | 0.1864               |
| 30-<35                           | 162                         | 34                                   | 21.0% | 0.65 (0.38 to 1.09)  | 0.0995               |
| 35-<40                           | 63                          | 14                                   | 22.2% | 0.69 (0.35 to 1.39)  | 0.3022               |
| ≥40                              | 22                          | 1                                    | 4.5%  | 0.12 (0.02 to 0.89)  | 0.0380*              |
| Ethnicity                        |                             |                                      |       |                      |                      |
| Not Hispanic/Not Latinx          | 93                          | 16                                   | 17.2% | ref                  |                      |
| Hispanic/Latinx                  | 493                         | 117                                  | 23.7% | 1.50 (0.84 to 2.67)  | 0.1702               |
| Race                             |                             |                                      |       |                      |                      |
| White                            | 375                         | 82                                   | 21.9% | ref                  |                      |
| American Indian/Alaska Native    | 9                           | 3                                    | 33.3% | 1.79 (0.44 to 7.30)  | 0.4190               |
| Asian                            | 9                           | 3                                    | 33.3% | 1.79 (0.44 to 7.30)  | 0.4190               |
| Black                            | 7                           | 1                                    | 14.3% | 0.60 (0.07 to 5.02)  | 0.6336               |
| Native Hawaiian/Pacific Islander | 3                           | 0                                    | 0.0%  | 0.00 (0.00 to Inf)   | 0.9792               |
| More than one race               | 26                          | 4                                    | 15.4% | 0.65 (0.22 to 1.94)  | 0.4393               |
| Sex                              |                             |                                      |       |                      |                      |
| Female                           | 44                          | 10                                   | 22.7% | ref                  |                      |
| Male                             | 634                         | 144                                  | 22.7% | 1.00 (0.48 to 2.07)  | 0.9982               |
| Children ≤ 18 y in household     |                             |                                      |       |                      |                      |
| No                               | 407                         | 102                                  | 25.1% | ref                  |                      |
| Yes                              | 273                         | 54                                   | 19.8% | 0.74 (0.51 to 1.07)  | 0.1091               |
| No. in household                 |                             |                                      |       |                      |                      |
| 1                                | 98                          | 22                                   | 22.4% | ref                  |                      |
| 2-4                              | 393                         | 97                                   | 24.7% | 1.13 (0.67 to 1.92)  | 0.6446               |
| >4                               | 173                         | 34                                   | 19.7% | 0.84 (0.46 to 1.55)  | 0.5852               |
| Comorbidity <sup>3</sup>         |                             |                                      |       |                      |                      |
| Asthma                           | 27                          | 4                                    | 14.8% | 0.59 (0.20 to 1.73)  | 0.3364               |
| Hypertension                     | 47                          | 11                                   | 23.4% | 1.06 (0.53 to 2.13)  | 0.8741               |
| Diabetes mellitus                | 15                          | 3                                    | 20.0% | 0.86 (0.24 to 3.09)  | 0.8168               |
| Other lung disease               | 2                           | 1                                    | 50.0% | 3.47 (0.22 to 55.71) | 0.3805               |
| Other chronic medical            | 9                           | 2                                    | 22.2% | 0.99 (0.20 to 4.79)  | 0.9856               |
| Smoking history                  |                             |                                      |       |                      |                      |
| Never                            | 546                         | 124                                  | 22.7% | ref                  |                      |
| Prior                            | 58                          | 15                                   | 25.9% | 1.18 (0.64 to 2.20)  | 0.5933               |
| Current                          | 80                          | 17                                   | 21.3% | 0.92 (0.52 to 1.62)  | 0.7641               |

<sup>1</sup> Not reported data: age group (n=1), BMI (83), ethnicity (126), race (283), sex (34), children in HH (31), No. in HH (47), comorbidities (28).

<sup>2</sup> P-values unadjusted for multiple hypothesis testing. \* P<0.05

<sup>3</sup> Other comorbidities with no seropositive individuals (n= number reporting comorbidity): coronary heart disease (n=3), chronic kidney disease (2), stroke (2), COPD (0), Heart failure (0), cancer receiving treatment (1), cancer not receiving treatment (3), other heart disease (0), other immunocompromised (0).

**Table S2:** Symptoms reported by healthy/normal versus overweight but not obese seropositive individuals (n=178)

| Clinical feature                                                                     | Normal weight (18.5-<25)<br>(n=89) |       | Overweight (25-<30)<br>(n=89) |       | P-value <sup>1</sup> |
|--------------------------------------------------------------------------------------|------------------------------------|-------|-------------------------------|-------|----------------------|
|                                                                                      | N                                  | %     | N                             | %     |                      |
| Fever                                                                                | 7                                  | 7.9%  | 6                             | 6.7%  | 0.76                 |
| Chills                                                                               | 9                                  | 10.1% | 11                            | 12.4% | 0.63                 |
| Cough                                                                                | 16                                 | 18.0% | 14                            | 15.7% | 0.68                 |
| Loss of smell                                                                        | 9                                  | 10.1% | 14                            | 15.7% | 0.27                 |
| Loss of taste                                                                        | 8                                  | 9.0%  | 11                            | 12.4% | 0.46                 |
| Nausea and /or vomiting                                                              | 5                                  | 5.6%  | 5                             | 5.6%  | 1.00                 |
| Diarrhea                                                                             | 7                                  | 7.9%  | 11                            | 12.4% | 0.32                 |
| Congestion                                                                           | 18                                 | 20.2% | 17                            | 19.1% | 0.85                 |
| Sore throat                                                                          | 11                                 | 12.4% | 14                            | 15.7% | 0.54                 |
| Myalgias                                                                             | 13                                 | 14.6% | 11                            | 12.4% | 0.67                 |
| Increased fatigue                                                                    | 23                                 | 25.8% | 14                            | 15.7% | 0.10                 |
| <b>Aggregate symptom measures<sup>2</sup></b>                                        |                                    |       |                               |       |                      |
| Any symptom                                                                          | 36                                 | 40.4% | 35                            | 39.3% | 0.88                 |
| ≥3 symptoms                                                                          | 19                                 | 21.3% | 20                            | 22.5% | 0.85                 |
| ≥6 symptoms                                                                          | 11                                 | 12.4% | 8                             | 9.0%  | 0.46                 |
| Any primary symptom                                                                  | 20                                 | 22.5% | 22                            | 24.7% | 0.73                 |
| ≥3 primary symptoms                                                                  | 10                                 | 11.2% | 10                            | 11.2% | 1.00                 |
| Symptoms count (mean)                                                                | 126                                | 1.42  | 128                           | 1.44  | 0.96                 |
| Primary symptom count (mean)                                                         | 49                                 | 0.55  | 56                            | 0.63  | 0.68                 |
| <sup>1</sup> Chi-squared test of proportions and ANOVA of means                      |                                    |       |                               |       |                      |
| <sup>2</sup> Primary symptoms: Fever, chills, cough, loss of smell and loss of taste |                                    |       |                               |       |                      |

**Table S3:** Results of univariate differences (Mann-Whitney U test) in immune features by obese (n=25) versus non-obese (n=52) status

| Feature    | p-value  |
|------------|----------|
| FcgR3b-RBD | 2.84E-01 |
| FcgR3b-S   | 2.30E-01 |
| FcgR3b-N   | 1.70E-01 |
| FcgR3b-NTD | 2.47E-01 |
| IgA1-N     | 3.14E-01 |
| IgA1-S     | 1.41E-01 |
| IgA1-NTD   | 3.32E-01 |
| IgA1-RBD   | 2.38E-01 |
| IgG1-N     | 1.33E-01 |
| IgG1-NTD   | 1.09E-01 |
| IgG1-S     | 2.23E-01 |
| IgG1-RBD   | 3.20E-01 |
| IgG3-N     | 3.51E-01 |
| IgG3-S     | 4.38E-01 |
| IgG3-NTD   | 4.24E-01 |
| IgG3-RBD   | 1.51E-01 |
| IgM-RBD    | 2.23E-01 |
| IgM-S      | 2.03E-01 |
| IgM-NTD    | 2.84E-01 |
| IgM-N      | 1.45E-01 |
